# Supplementary material for: Visible light initiated oxidative coupling of alcohols and o-phenylenediamines to synthesize benzimidazoles over MIL-101(Fe) promoted by plasmonic Au
Source: Royal Society of Chemistry journal article supplement (doi:10.1039/d1gc01047f), 2021-01-01

## Supporting Information

**Fig. S1** The spectrum of the LED lamp used in the catalytic reaction

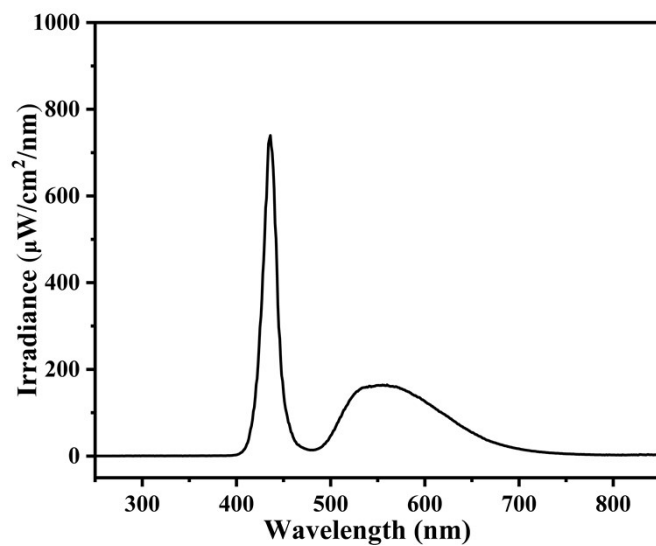

**Fig. S2** GC graphs of standard materials and the product after the reaction (a) o-phenylenediamine; (b) 2-methylbenzimidazole; (c) filtrate obtained after reaction over MIL-101(Fe); (d) filtrate obtained after reaction over Au/MIL-101(Fe)

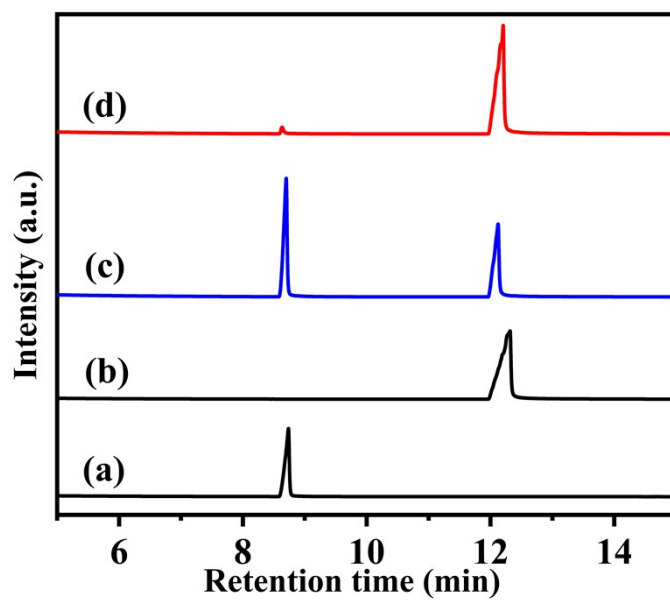

**Fig. S3** Powder XRD patterns of the as-synthesized MIL-101(Fe) and calculated MIL-101(Fe).

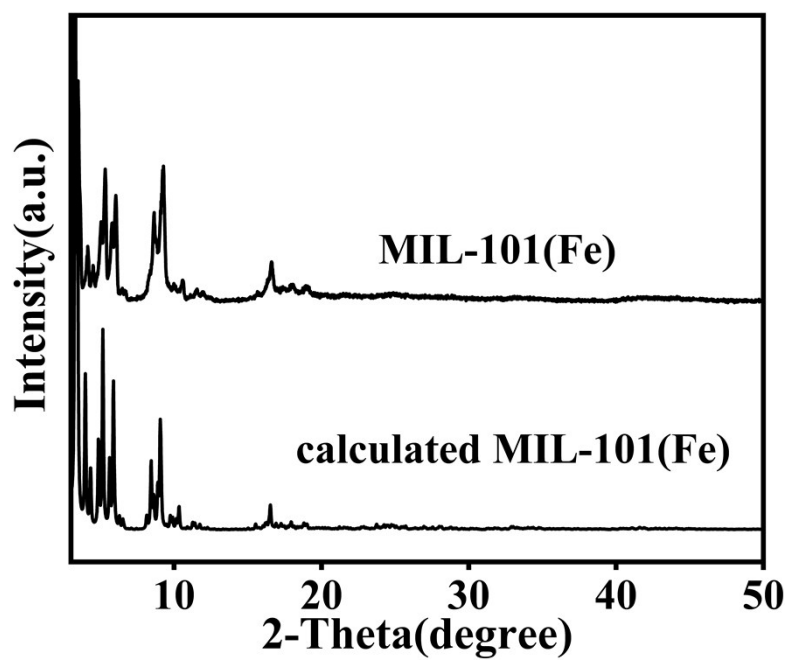

**Fig. S4** N<sub>2</sub> adsorption/desorption isotherms of MIL-101(Fe) and 1.0 wt % Au/ MIL-101(Fe) nanocomposite obtained at 77K

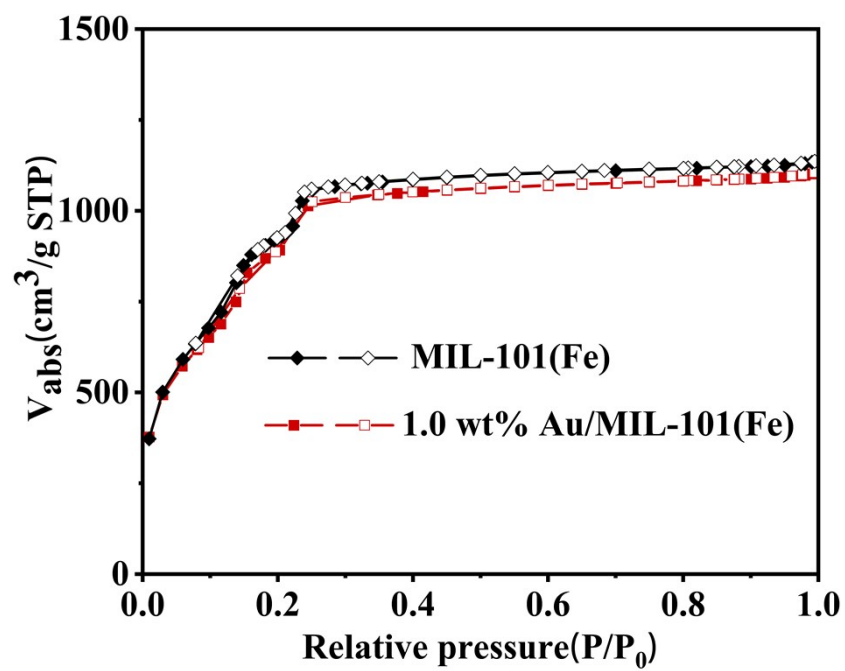

**Fig. S5** TEM image of MIL-101(Fe)

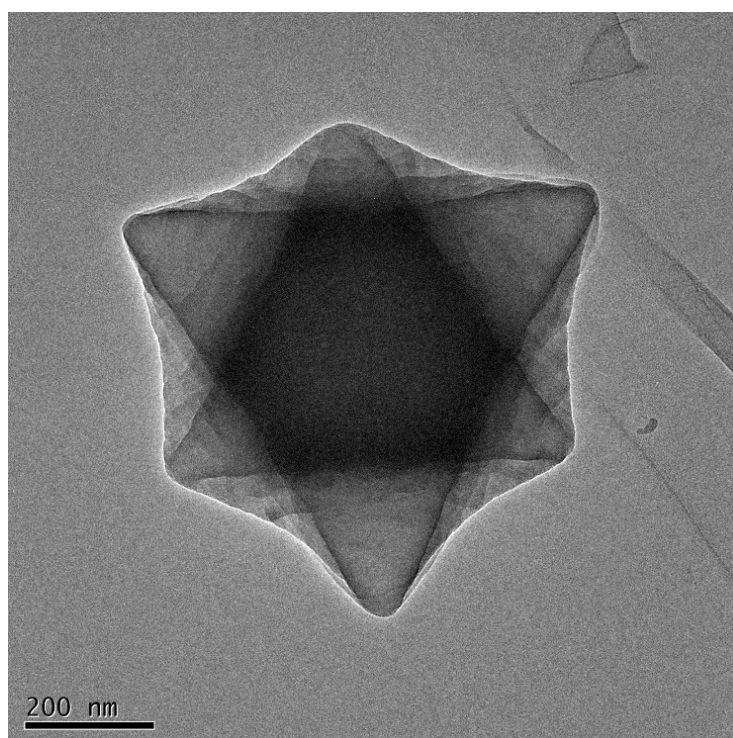

**Fig. S6** TEM image of Au colloids.

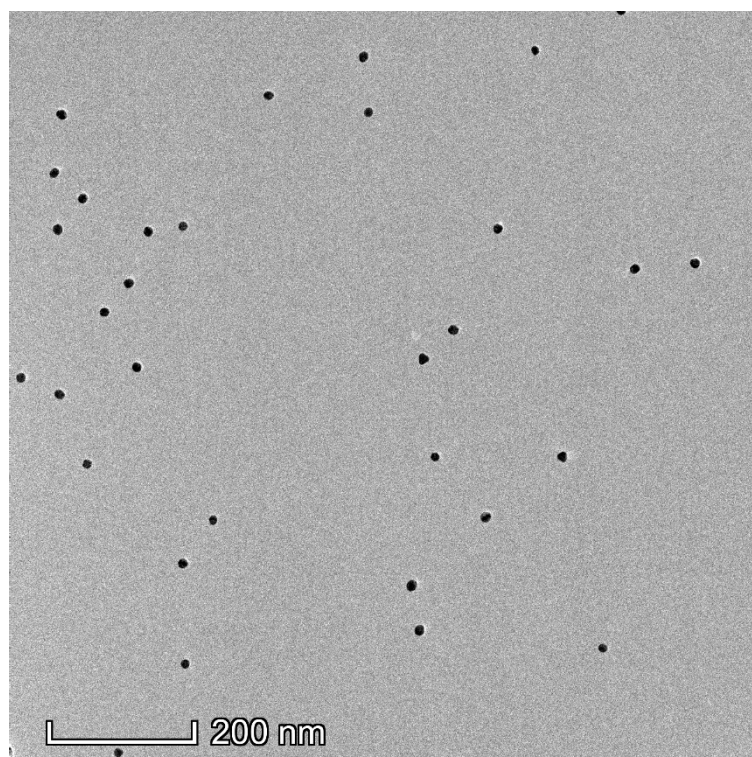

**Fig. S7** UV-visible absorption spectrum of Au colloids.

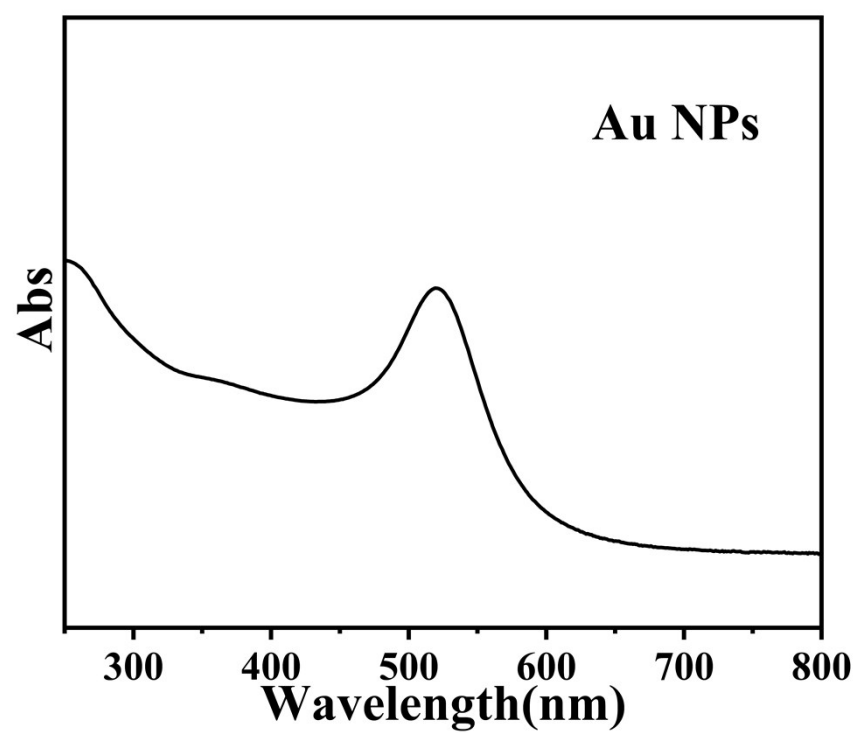

**Fig. S8** Zeta potentials of Au colloids and MIL-101(Fe).

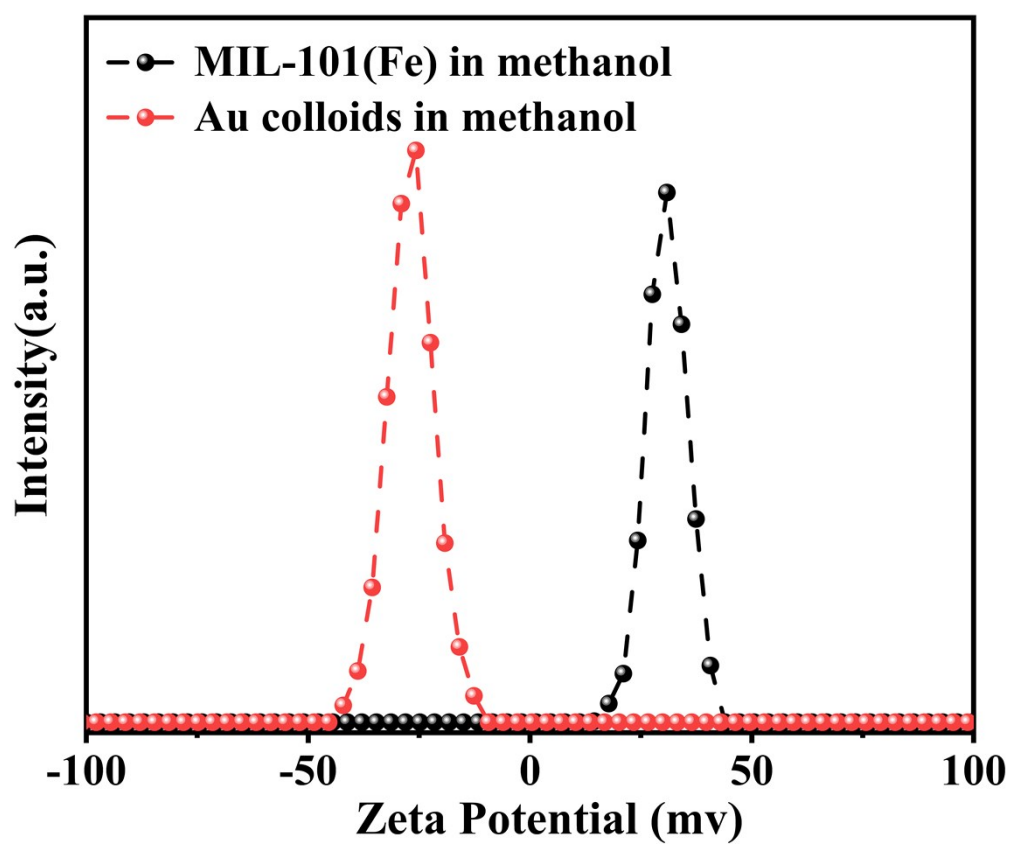

**Fig. S9** DMPO spin-trapping ESR spectra of the reaction system containing o-phenylenediamine, ethanol, DMPO and photocatalysts under different light intensity (a) MIL-101(Fe); (b) 1wt% Au/MIL-101(Fe).

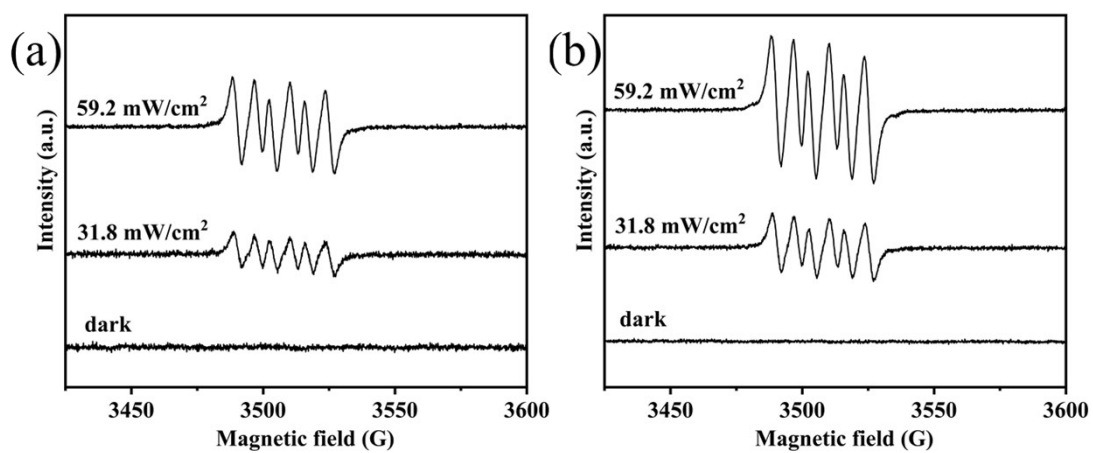

**Fig. S10** XRD patterns of fresh 1.0 wt% Au/MIL-100(Fe) and the used one.

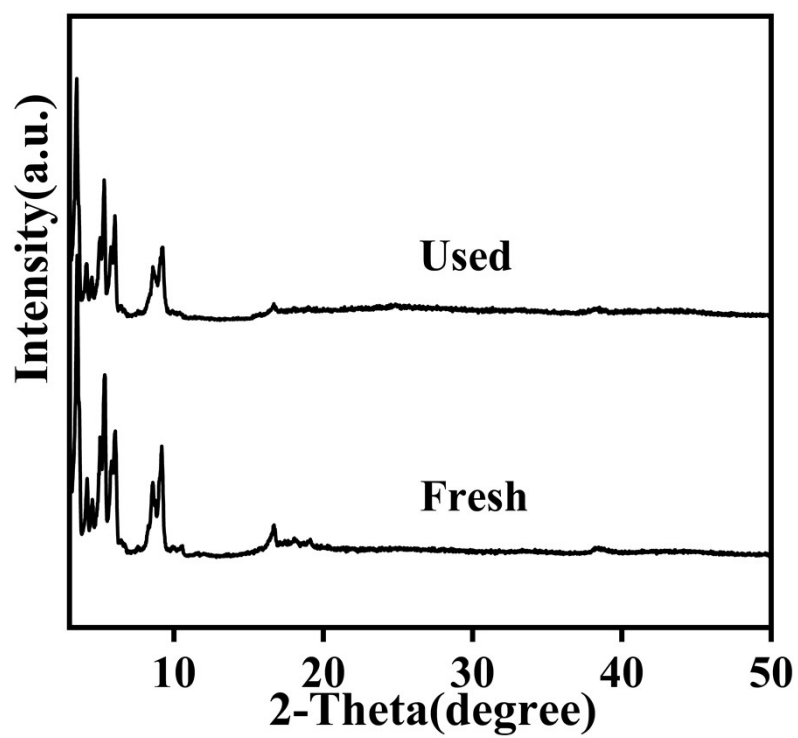

Supplement: d1gc01047f1.pdf [file d1gc01047f1.pdf]
